# Supplementary material
Source: Research Square preprint supplement (doi:10.21203/rs.3.rs-8810789/v1)
Supplement: Supplementary file 1 [file f341fb97e0496cff07155416.docx]

**Supplemental**

TBWs were also calculated for emotionally incongruent conditions (Fig. 2, Table 2), and a one-way repeated-measures ANOVA compared TBWs across the six conditions. A significant main effect of emotion was observed (F(5,620) = 21.16, p < 0.001, ƞp2 = 0.14). Follow-up paired t-tests were conducted, with idiosyncratic differences observed (see detailed statistics in Supplemental Table S1). Of note, the AA-NV condition was associated with a TBW significantly narrower than all other incongruent conditions at the p < 0.001 level.

| **Supplemental Table S1. Comparing TBWs across emotionally incongruent conditions** | | | | |
| --- | --- | --- | --- | --- |
|  |  | **Paired t-test statistics (df = 124)** | | |
| **Modality** | **Stimulus pair** | ***t*** | ***p*** | **Cohen’s *d*** |
| Audiovisual  Incongruent | AA-HV vs AA-NV | 8.52 | < 0.001 | 0.76 |
| AA-HV vs HA-AV | 4.35 | < 0.001 | 0.39 |
| AA-HV vs HA-NV | 1.32 | 0.190 | 0.12 |
| AA-HV vs NA-AV | 3.10 | 0.002 | 0.28 |
| AA-HV vs NA-HV | 0.17 | 0.863 | 0.02 |
| AA-NV vs HA-AV | 3.65 | < 0.001 | 0.33 |
| AA-NV vs HA-NV | 5.79 | < 0.001 | 0.52 |
| AA-NV vs NA-AV | 5.75 | < 0.001 | 0.51 |
| AA-NV vs NA-HV | 8.19 | < 0.001 | 0.73 |
| HA-AV vs HA-NV | 2.89 | 0.005 | 0.26 |
| HA-AV vs NA-AV | 1.84 | 0.068 | 0.16 |
| HA-AV vs NA-HV | 4.36 | < 0.001 | 0.39 |
| HA-NV vs NA-AV | 1.31 | 0.193 | 0.12 |
| HA-NV vs NA-HV | 1.33 | 0.186 | 0.12 |
| NA-AV vs NA-HV | 3.18 | 0.002 | 0.28 |
